# Supplementary material
Source: publisher figshare collection journal article supplement (https://acs.figshare.com/ndownloader/files/8342750)

## **Supporting Information**

### **Chiro-optical modulation for NURR1 production from stem cells**

Madhumita Patel, Hyo Jung Moon, Ja Hye Hong, and Byeongmoon Jeong\*

Department of Chemistry and Nanoscience, Ewha Womans University, 52 Ewhayeodae-gil,  
Seodaemun-gu, Seoul, Korea

\* Corresponding author.

E-mail addresses: [bjeong@ewha.ac.kr](mailto:bjeong@ewha.ac.kr), Tel.: +82 2 3277 3411; fax:+82 2 3277 3419.

**Figure S1.** Live and dead images of cells after exposure of TMSCs to L- and R-polarized blue (a), red (b), and green (c) LED lights for 24 hours. A neurogenic induction medium was used. Live cells and dead cells are stained in green and red, respectively. Scale bars are 100  $\mu\text{m}$  and 30  $\mu\text{m}$  (enlarged images). Cell images in absence of light (-L), cells exposed to an L-polarized light (PL) and an R-polarized light (PR) are shown.

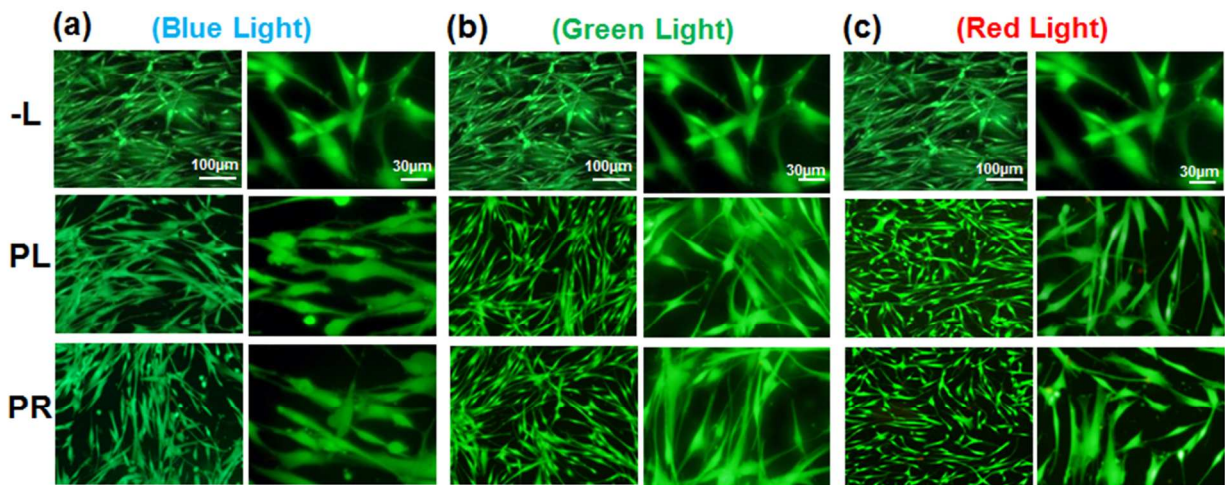

**Figure S2.** ATP production (a) and intracellular calcium content (b) induced by exposure of TMSCs to the polarized blue LED lights. Cells in absence of light (-L), cells exposed to an L-polarized blue light (PL) and an R-polarized blue light (PR) are compared for fluorescence intensity for each system relative to the -L system. \* indicate  $p < 0.05$  by one way ANOVA.

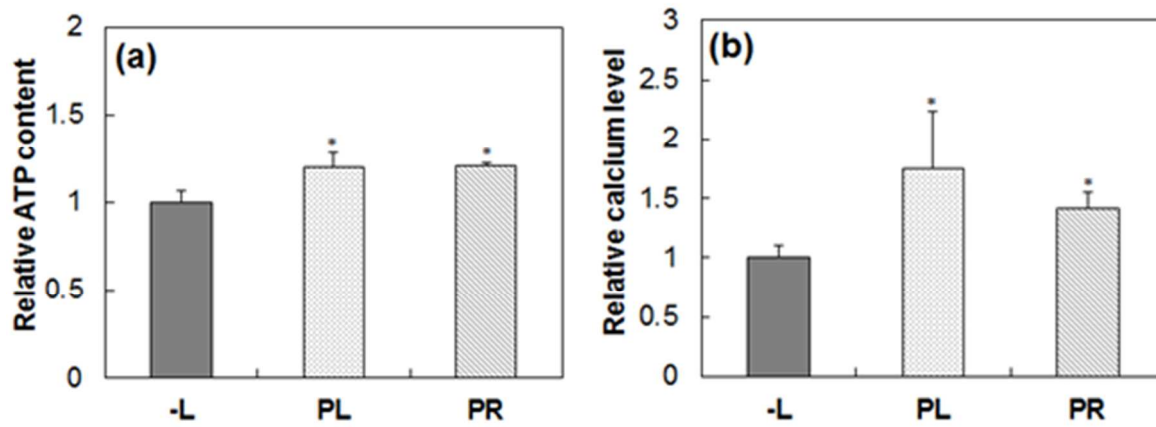

Supplement: Supplementary file 1 [file 8342750]
